# Supplementary material for: Oncolytic vaccinia virus delivering tethered IL-12 enhances antitumor effects with improved safety
Source: PubMed Central journal article supplement — J Immunother Cancer. 2020 Mar 24;8(1):e000710. doi: 10.1136/jitc-2020-000710 (PMC7103801; doi:10.1136/jitc-2020-000710), 2020-03-24
Supplement: jitc-2020-000710supp001.pdf [file jitc-2020-000710supp001.pdf]

## Oncolytic vaccinia virus delivering tethered IL-12 enhances antitumor effects with improved safety

**Yan Ge<sup>1,3,#</sup>, Haiyan Wang<sup>1,3,#</sup>, Jinghua Ren<sup>1,4</sup>, Weilin Liu<sup>1,5</sup>, Lingjuan Chen<sup>1,4</sup>, Hongqi Chen<sup>1,6</sup>, Junjie Ye<sup>1,7</sup>, Enyong Dai<sup>1,8</sup>, Congrong Ma<sup>1,2</sup>, Songguang Ju<sup>3</sup>, Z. Sheng Guo<sup>1,2</sup>, Zuqiang Liu<sup>1,2\*</sup>, and David L. Bartlett<sup>1,2\*</sup>**

<sup>1</sup>Department of Surgery, University of Pittsburgh School of Medicine; <sup>2</sup>UPMC Hillman Cancer Center, Pittsburgh, PA 15213, USA; <sup>3</sup>Department of Immunology, School of Biology and Basic Medical Sciences, Medical College, Soochow University, Suzhou, Jiangsu Province, China; <sup>4</sup>Cancer Center, Union Hospital, Huazhong University of Science and Technology, Wuhan, Hubei Province, China; <sup>5</sup>Xiangya School of Medicine, Central South University, Changsha, Hunan Province, China; <sup>6</sup>Shanghai Jiao Tong University Affiliated Sixth People's Hospital, Shanghai, China; <sup>7</sup>Department of Cancer Center, Renmin Hospital of Wuhan University, Wuhan, Hubei Province, China, <sup>8</sup>Department of Oncology and Hematology, China-Japan Union Hospital of Jilin University, Changchun, Jilin Province, China

**Running title:** Oncolytic virus delivering tethered IL-12 safe and effective

# Y. Ge and H. Wang contributed equally to this paper.

\*Corresponding authors:

David L. Bartlett, MD  
E-mail: [Bartlettdl@upmc.edu](mailto:Bartlettdl@upmc.edu)

Zuqiang Liu, PhD  
E-mail: [liuz@upmc.edu](mailto:liuz@upmc.edu)

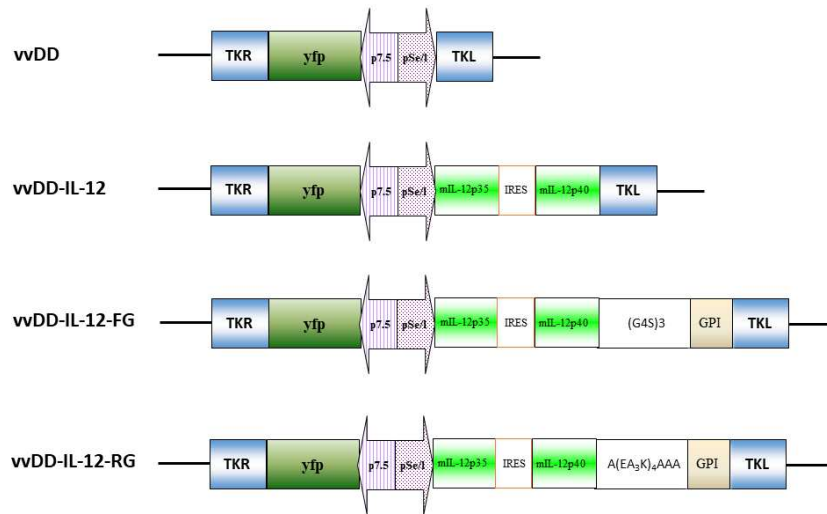

**Figure S1. Schematic diagram of viral IL-12 variants.** vvDD-IL-12, vvDD-IL-12-FG, and vvDD-IL-12-RG were generated by homologous recombination of murine *IL-12* variants into the *tk* locus of vaccinia viral genome, carrying secreted IL-12, IL-12-flexible linker (G<sub>4</sub>S)<sub>3</sub>-GPI anchor sequence amplified from human CD16b, and IL-12-rigid linker A(EA<sub>3</sub>K)<sub>4</sub>AAA-GPI anchor sequence amplified from human CD16b, respectively.

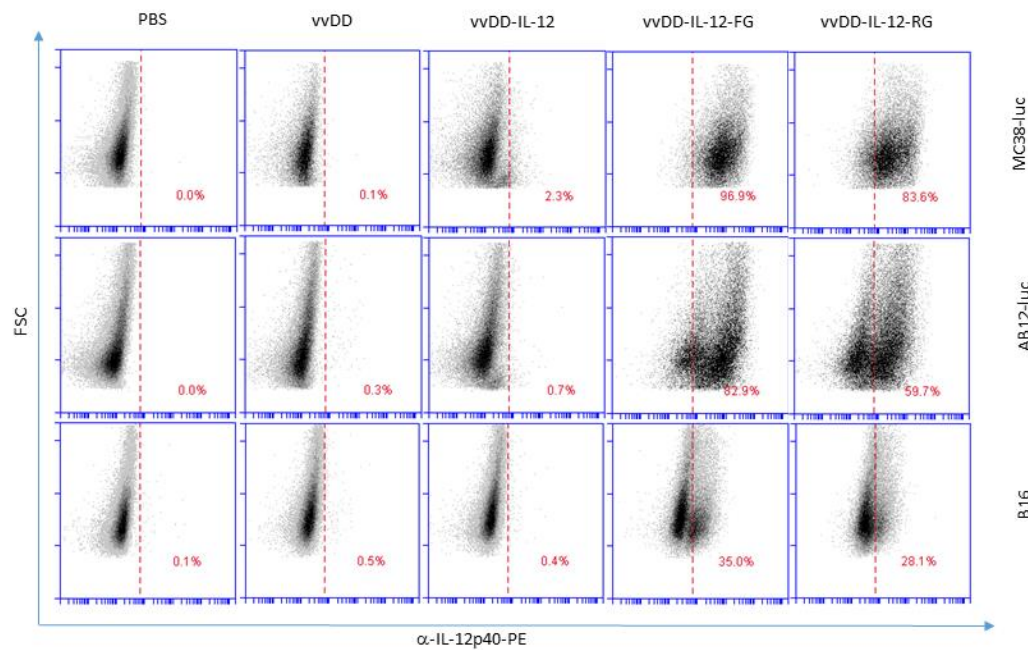

**Figure S2. Viral delivered IL-12 expression in tumor cells.** Tumor cell MC38-luc ( $3 \times 10^5$  cells), B16 ( $2 \times 10^5$  cells), or AB12-luc ( $3 \times 10^5$  cells) were mock-infected or infected with vvDD, vvDD-IL-12, vvDD-IL-12-FG, and vvDD-IL-12-RG at a MOI of 1. The cell pellets were harvested 24 hours post-infection to measure membrane-bound IL-12 using flow cytometry (cell surface staining).

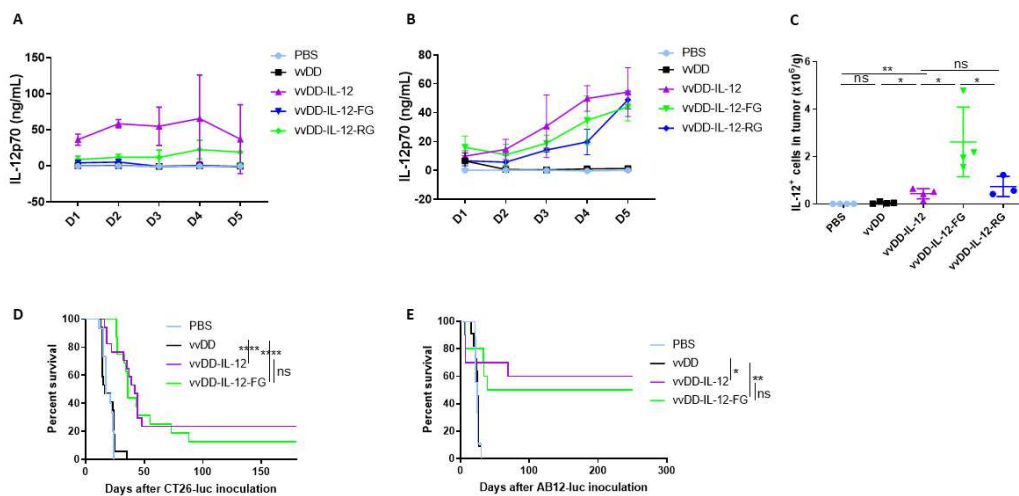

**Figure S3. vvDD-IL-12-FG treatment produces tethered IL-12 in tumors and is safe and effective in therapeutic tumor models.** B6 mice were i.p. inoculated with  $5 \times 10^5$  MC38-luc cells and treated with PBS, vvDD, vvDD-IL-12, vvDD-IL-12-FG, or vvDD-IL-12-RG at  $5 \times 10^8$  PFU/mouse nine days post-tumor inoculation ( $n=3-5$ ). Sera were collected daily until day 5 to measure the amount of IL-12 (A) and IFN- $\gamma$  in sera (B). The mice treated above were sacrificed at day 5 to measure IL-12 membrane association in tumor using flow cytometry (C). BalB/c mice were i.p. inoculated with  $4 \times 10^5$  CT26-luc (D) or AB12-luc cells (E), respectively, and treated with PBS, vvDD, vvDD-IL-12, or vvDD-IL-12-FG at  $2 \times 10^8$  PFU/mouse five days post-tumor inoculation and a log-rank (Mantel-Cox) test was used to compare survival rates between these two tumor models. \*  $P < 0.05$ ; \*\*  $P < 0.01$ ; \*\*\*  $P < 0.001$ ; and \*\*\*\*  $P < 0.0001$ . ns: not significant.

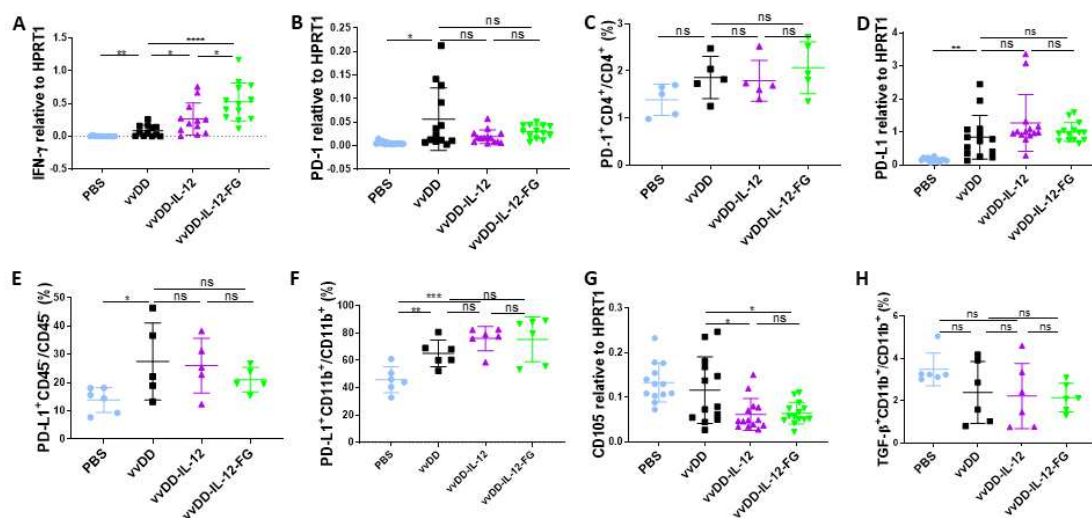

**Figure S4. IL-12-variant treatments modify the tumor microenvironment.** B6 mice were inoculated i.p. with  $5 \times 10^5$  MC38-luc cells and treated with PBS, vvDD, vvDD-IL-12, or vvDD-IL-12-FG at  $2 \times 10^8$  PFU/mouse nine days post-tumor inoculation. Tumor-bearing mice were sacrificed five days post-treatment and primary tumors were collected and analyzed using RT-qPCR to determine IFN- $\gamma$  (A), PD-1 (B), PD-L1 (D) and CD105 (G), using flow cytometry to determine PD-1<sup>+</sup>CD4<sup>+</sup> (C), PD-L1<sup>+</sup>CD45<sup>-</sup> (E), PD-L1<sup>+</sup>CD11b<sup>+</sup> (F) and TGF- $\beta$ <sup>+</sup>CD11b<sup>+</sup> (H) cells. \*  $P < 0.05$ ; \*\*  $P < 0.01$ ; \*\*\*  $P < 0.001$ ; and \*\*\*\*  $P < 0.0001$ . ns: not significant.

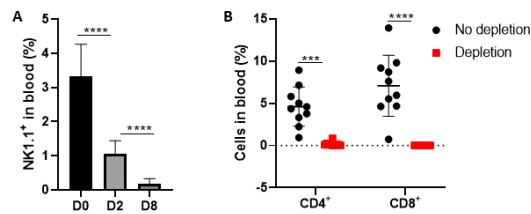

**Figure S5. Antibodies can deplete relative cell population efficiently *in vivo*.** B6 mice were i.p. inoculated with  $5 \times 10^5$  MC38-luc cells and treated with  $\alpha$ -CD8 Ab (250  $\mu$ g per injection),  $\alpha$ -CD4 Ab (150  $\mu$ g per injection), PK136 (300  $\mu$ g per injection) as shown in Fig. 3 P. Blood were collected from mouse tail vein and stained to monitor NK1.1+ cells at day 2 and day 8 after last antibody injection (**A**), CD4<sup>+</sup> T cells 3 days after last antibody injection and CD8<sup>+</sup> T cells 5 days after last antibody injection (**B**) by flow cytometry, respectively. \*  $P < 0.05$ ; \*\*  $P < 0.01$ ; \*\*\*  $P < 0.001$ ; and \*\*\*\*  $P < 0.0001$ . ns: not significant.
