# Supplementary material for: Oncolytic vaccinia virus delivering tethered IL-12 enhances antitumor effects with improved safety
Source: PubMed Central journal article supplement — J Immunother Cancer. 2020 Mar 24;8(1):e000710. doi: 10.1136/jitc-2020-000710 (PMC7103801; doi:10.1136/jitc-2020-000710), 2020-03-24
Supplement: jitc-2020-000710supp002.pdf [file jitc-2020-000710supp002.pdf]

## **Oncolytic vaccinia virus delivering tethered IL-12 enhances antitumor effects with improved safety**

**Yan Ge<sup>1,3,#</sup>, Haiyan Wang<sup>1,3,#</sup>, Jinghua Ren<sup>1,4</sup>, Weilin Liu<sup>1,5</sup>, Lingjuan Chen<sup>1,4</sup>, Hongqi Chen<sup>1,6</sup>, Junjie Ye<sup>1,7</sup>, Enyong Dai<sup>1,8</sup>, Congrong Ma<sup>1,2</sup>, Songguang Ju<sup>3</sup>, Z. Sheng Guo<sup>1,2</sup>, Zuqiang Liu<sup>1,2\*</sup>, and David L. Bartlett<sup>1,2\*</sup>**

<sup>1</sup>Department of Surgery, University of Pittsburgh School of Medicine; <sup>2</sup>UPMC Hillman Cancer Center, Pittsburgh, PA 15213, USA; <sup>3</sup>Department of Immunology, School of Biology and Basic Medical Sciences, Medical College, Soochow University, Suzhou, Jiangsu Province, China; <sup>4</sup>Cancer Center, Union Hospital, Huazhong University of Science and Technology, Wuhan, Hubei Province, China; <sup>5</sup>Xiangya School of Medicine, Central South University, Changsha, Hunan Province, China; <sup>6</sup>Shanghai Jiao Tong University Affiliated Sixth People's Hospital, Shanghai, China; <sup>7</sup>Department of Cancer Center, Renmin Hospital of Wuhan University, Wuhan, Hubei Province, China, <sup>8</sup>Department of Oncology and Hematology, China-Japan Union Hospital of Jilin University, Changchun, Jilin Province, China

**Running title:** Oncolytic virus delivering tethered IL-12 safe and effective

# Y. Ge and H. Wang contributed equally to this paper.

\*Corresponding authors:

David L. Bartlett, MD  
E-mail: [Bartlettdl@upmc.edu](mailto:Bartlettdl@upmc.edu)

Zuqiang Liu, PhD  
E-mail: [liuz@upmc.edu](mailto:liuz@upmc.edu)

Table S1

| Primer                                                                                                                                      | PCR Template          | Cloning Plasmid            | Resulting Plasmid                   |
|---------------------------------------------------------------------------------------------------------------------------------------------|-----------------------|----------------------------|-------------------------------------|
| P1:<br>5'GGCGGTCGAC <u>GAGCTC</u> ATGTGTCCTCAGAAGCT<br>AACCATC3'<br>P2:<br>5'CCGC <u>GTTAAC</u> CTAGGATCGGACCCTGCAGGGAA<br>CAC3'            | pGEM-IL-12B           | pCMS1-IRES                 | pCMS1-IRES-IL-<br>12p40             |
| P3:<br>5'GGCG <u>GTCGAC</u> ATGGTCAGCGTTCCAACAGCCTC<br>3'<br>P4: 5'<br>CGCG <u>GGCGCGCC</u> TCAGGCGGAGCTCAGATAGCC<br>C3'                    | pGEM-IL-12A           | pCMS1-IRES-<br>IL-12p40    | pCMS1-IL-12p35-<br>IRES-IL-12p40    |
| P1:<br>5'GGCG <u>GTCGAC</u> GAGCTCATGTGTCCTCAGAAGCT<br>AACCATC3'<br>P5:<br>5'CCGC <u>GGCCGGCC</u> CGGATCGGACCCTGCAGGGA<br>ACAC3'            | pGEM-IL-12B           | pCMS1-IRES-<br>FGPI        | pCMS1-IL-12p40-<br>FG               |
| P1:<br>5'GGCGGTCGAC <u>GAGCTC</u> ATGTGTCCTCAGAAGCT<br>AACCATC3'<br>P6:<br>5'GCGC <u>GTTAACT</u> CAAATGTTTGTCTTCACAGAG3'                    | pCMS1-IL-<br>12p40-FG | pCMS1-IRES                 | pCMS1-IRES-IL-<br>12p40-FG          |
| P3:<br>5'GGCG <u>GTCGAC</u> ATGGTCAGCGTTCCAACAGCCTC<br>3'<br>P4: 5'<br>CGCG <u>GGCGCGCC</u> TCAGGCGGAGCTCAGATAGCC<br>C3'                    | pGEM-IL-12A           | pCMS1-IRES-<br>IL-12p40-FG | pCMS1-IL-12p35-<br>IRES-IL-12p40-FG |
| P7:<br>5'GGCC <u>GGCCGGCC</u> GCTGAAGCTGCCGAAAAGA<br>GGCCGCTGCGAAGGAGGCCGCGGCTAAG3'<br>P6:<br>5'GCGC <u>GTTAACT</u> CAAATGTTTGTCTTCACAGAG3' | pCMS1-IRES-<br>RGPI   | pCMS1-IL-<br>12p40-FG      | pCMS1-IL-12p40-<br>RG               |
| P1:<br>5'GGCGGTCGAC <u>GAGCTC</u> ATGTGTCCTCAGAAGCT<br>AACCATC3'<br>P6:<br>5'GCGC <u>GTTAACT</u> CAAATGTTTGTCTTCACAGAG3'                    | pCMS1-IL-<br>12p40-RG | pCMS1-IRES                 | pCMS1-IRES-IL-<br>12p40-RG          |
| P3:<br>5'GGCG <u>GTCGAC</u> ATGGTCAGCGTTCCAACAGCCTC<br>3'<br>P4: 5'<br>CGCG <u>GGCGCGCC</u> TCAGGCGGAGCTCAGATAGCC<br>C3'                    | pGEM-IL-12A           | pCMS1-IRES-<br>IL-12p40-RG | pCMS1-IL-12p35-<br>IRES-IL-12p40-RG |
